# Supplementary material for: Inhibitory Mechanism of Baicalein on Acetylcholinesterase: Inhibitory Interaction, Conformational Change, and Computational Simulation
Source: MDPI journal article supplement (doi:10.3390/foods11020168), 2022-01-10
Supplement: s1 [file s1]

## Supplementary data

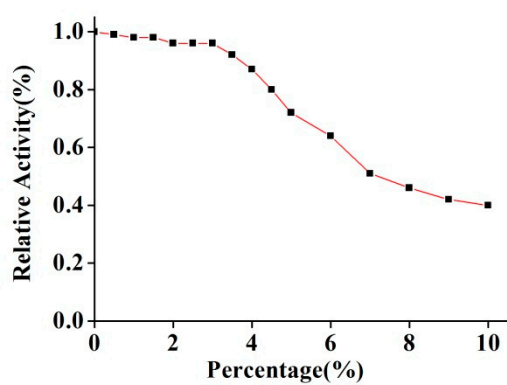

Figure S1. Effect of ethanol on AChE activity.

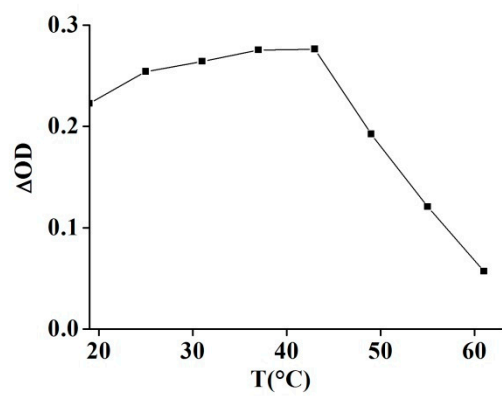

Figure S2. Effect of temperature on AChE activity.
